# Supplementary material for: A Fractal Model of Effective Thermal Conductivity of Porous Materials Considering Tortuosity
Source: MDPI journal article supplement (doi:10.3390/en16010271), 2022-12-27
Supplement: s1 [file s1]

# **A Fractal Model of Effective Thermal Conductivity of Porous materials Considering Tortuosity**

Chen Zhan <sup>a,b</sup>, Wenzhi Cui <sup>a,b,\*</sup>, Longjian Li <sup>a,b</sup>

<sup>a</sup>School of Energy and Power Engineering, Chongqing University, Chongqing 400030, China

<sup>b</sup>Key Laboratory of Low-grade Energy Utilization Technology and Systems (Chongqing University), Ministry of Education of PRC, Chongqing 400030, China

\*Corresponding author.

E-mail address: wzcui@cqu.edu.cn (W. Cui).

Table S1. The experimental data and corresponding derived parameters from Jing [28].

| Original data |                                                    |                                                    |                      |                      |            | Derived parameters |                  |                  |
|---------------|----------------------------------------------------|----------------------------------------------------|----------------------|----------------------|------------|--------------------|------------------|------------------|
| $\varepsilon$ | $\lambda_I$<br>(Wm <sup>-1</sup> K <sup>-1</sup> ) | $\lambda_2$<br>(Wm <sup>-1</sup> K <sup>-1</sup> ) | $\Phi_{max}$<br>(μm) | $\Phi_{min}$<br>(μm) | $L$<br>(m) | $\tau$<br>Eq.(22)  | $D_f$<br>Eq.(21) | $D_T$<br>Eq.(10) |
| 0.7137        | 0.53                                               | 0.026                                              | 3200                 | 134                  | 0.02       | 1.2185             | 1.8937           | 1.0458           |
| 0.7145        |                                                    |                                                    |                      |                      |            | 1.2179             | 1.8941           | 1.0457           |
| 0.7692        |                                                    |                                                    | 4075                 | 149                  |            | 1.1710             | 1.9207           | 1.0415           |
| 0.7697        |                                                    |                                                    |                      |                      |            | 1.1706             | 1.9209           | 1.0374           |
| 0.7705        |                                                    |                                                    |                      |                      |            | 1.1701             | 1.9212           | 1.0373           |
| 0.8272        |                                                    |                                                    |                      |                      |            | 1.1346             | 1.9367           | 1.0310           |
| 0.8275        |                                                    |                                                    |                      |                      |            | 1.1344             | 1.9368           | 1.0310           |
| 0.829         |                                                    |                                                    |                      |                      |            | 1.1335             | 1.9374           | 1.0308           |
| 0.8292        |                                                    |                                                    |                      |                      |            | 1.1334             | 1.9375           | 1.0308           |
| 0.8293        |                                                    |                                                    |                      |                      |            | 1.1334             | 1.9376           | 1.0308           |
| 0.8297        |                                                    |                                                    |                      |                      |            | 1.1331             | 1.9377           | 1.0307           |
| 0.8312        |                                                    |                                                    |                      |                      |            | 1.1322             | 1.9383           | 1.0305           |
| 0.8313        |                                                    |                                                    |                      |                      |            | 1.1322             | 1.9284           | 1.0305           |
| 0.8315        |                                                    |                                                    |                      |                      |            | 1.1321             | 1.9384           | 1.0305           |
| 0.8316        |                                                    |                                                    |                      |                      |            | 1.1320             | 1.9385           | 1.0305           |
| 0.8318        |                                                    |                                                    |                      |                      |            | 1.1319             | 1.9386           | 1.0305           |
| 0.8324        |                                                    |                                                    |                      |                      |            | 1.1315             | 1.9388           | 1.0304           |
| 0.8339        |                                                    |                                                    |                      |                      |            | 1.1306             | 1.9394           | 1.0302           |
| 0.8345        |                                                    |                                                    |                      |                      |            | 1.1303             | 1.9396           | 1.0301           |

Table S2. The experimental data and corresponding derived parameters from Wang [12],  
Shen [29] and Hu [31].

| Ref. | Original data |             |             |                                   |                                   |                          | Derived parameters |        |        |
|------|---------------|-------------|-------------|-----------------------------------|-----------------------------------|--------------------------|--------------------|--------|--------|
|      | $\varepsilon$ | $\lambda_1$ | $\lambda_2$ | $\Phi_{max}$<br>( $\mu\text{m}$ ) | $\Phi_{min}$<br>( $\mu\text{m}$ ) | $L$<br>( $\mu\text{m}$ ) | $\tau$<br>Eq.(22)  | $D_f$  | $D_T$  |
| Wang | 0.1336        | 3.35        | 0.026       | 100                               | 0.01                              | 46.5                     | 4.133              | 1.7815 | 1.1875 |
|      | 0.1609        | 3.35        | 0.026       | 100                               | 0.01                              | 46.5                     | 3.5015             | 1.8016 | 1.1652 |
| Shen | 0.3368        | 2.27        | 0.026       | 19.436                            | 0.490                             | 48.2                     | 1.7043             | 1.7043 | 1.1410 |
| Hu*  | 0.34          | 3.98        | 0.133       | -                                 | -                                 | -                        | 1.8956             | -      | -      |
|      | 0.38          | 3.98        | 0.133       | -                                 | -                                 | -                        | 1.7492             | -      | -      |

\* The data used to calculate the fractal parameters were absent, only the series-parallel thermal conductivity defined by Eq. (5) can be obtained.
